# Supplementary material
Source: publisher figshare collection journal article supplement (https://acs.figshare.com/ndownloader/files/5772363)

Journal of  
**Medicinal Chemistry**

J. Med. Chem., 1996, 39(16), 3046-3048, DOI: [10.1021/jm960331f](https://doi.org/10.1021/jm960331f)

**Terms & Conditions**

Electronic Supporting Information files are available without a subscription to ACS Web Editions. The American Chemical Society holds a copyright ownership interest in any copyrightable Supporting Information. Files available from the ACS website may be downloaded for personal use only. Users are not otherwise permitted to reproduce, republish, redistribute, or sell any Supporting Information from the ACS website, either in whole or in part, in either machine-readable form or any other form without permission from the American Chemical Society. For permission to reproduce, republish and redistribute this material, requesters must process their own requests via the RightsLink permission system. Information about how to use the RightsLink permission system can be found at <http://pubs.acs.org/page/copyright/permissions.html>

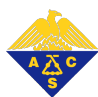

**ACS Publications**

MOST TRUSTED. MOST CITED. MOST READ.

Copyright © 1996 American Chemical Society

JM 960331F

## Experimental

Procedures for the preparation of D,L-**6** and conversion to L-**6** were adapted from the literature and are referenced. Detailed experimental descriptions will be provided on request. Reference and compound numbers refer to those in the main text.

$^1\text{H}$  and  $^{13}\text{C}$  NMR spectra were recorded on a Bruker ACP-300 spectrometer and chemical shifts are reported in  $\delta$  (ppm) relative to 3-(trimethylsilyl)propionic-2,2,3,3- $\text{d}_4$  acid, sodium salt. Infrared spectra were measured on a Nicolet 510 FT-IR spectrometer. Optical rotations were obtained at ambient temperature using a Perkin-Elmer 141 polarimeter and were measured at the sodium D line. All chemicals were obtained from Aldrich or Sigma unless otherwise noted. Porcine kidney D-Amino acid oxidase was from Sigma. Solvents were purified according to Perrin et al.<sup>25</sup> Chiral HPLC analyses were conducted on a Beckman System Gold (two model 125 pumps, model 166 UV detector, Rheodyne model 7725 injector) using a chiral mobile phase containing L-aspartame (Asp-Phe-OMe) and Cu(II).<sup>26</sup> Separation was on a Waters Novapak  $\text{C}_{18}$  reverse phase column (3.9 x 150 mm) along with an Upchurch  $\text{C}_{18}$  guard column (4.3 x 10 mm) at a flow rate 1.5 mL/min and UV detection was at 234 nm.

The preparation of D,L-**6** and conversion to L-**6** is shown below in Scheme 3. 4,5-Dehydro-D,L-pipecolic acid (D,L-**6**) was prepared according to the procedure of Burgstahler and Aiman as later modified by these authors.<sup>19</sup> Diethylacetamidomalonate was condensed with *cis*-1,4-dichloro-2-butene to give diethyl N-acetyl-1,2,3,6-tetrahydropyridine-2,2-dicarboxylate which was saponified and decarboxylated without isolation. Purification by crystallization from aqueous ethanol gave D,L-**6** in 50 - 60% yield.

Conversion of D,L-**6** to L-**6** was accomplished by repeatedly oxidizing D-**6** to the corresponding imine through the stereospecific action of D-amino acid oxidase, followed by borohydride reduction of the imine to D,L-**6**.<sup>20</sup> After four cycles the product was isolated by cation exchange chromatography (AG-50) and purified by recrystallization from methanol/acetone. NMR spectra of purified **6** are shown in Figure 4. Enantiomeric excess was greater than 95% as determined by optical rotation and chiral HPLC (Figure 5). **4,5-Dehydro-L-pipecolic acid (L-6)**: mp 264-265 °C (lit.<sup>27</sup> 273-274 °C);  $^1\text{H}$ -NMR (300 MHz,  $^2\text{H}_2\text{O}$ )  $\delta$  2.52 (m, 1H, H-3a), 2.73 (m, 1H, H-3b), 3.79 (bs, 2H, H-6), 4.17 (dd,  $J = 10.7, 5.5$  Hz, H-2), 5.80 (m, 1H, H-5), 6.00 (m, 1H, H-4);  $^{13}\text{C}$ -NMR (75 MHz,  $^2\text{H}_2\text{O}$ ) 27.7 (C-3), 44.7 (C-6), 56.4 (C-2), 122.6, 127.3 (C-4 and C-5), 174.7 (C-1); IR (KBr) 3200-3600, 1745, 1570  $\text{cm}^{-1}$ ;  $[\alpha]_{\text{D}} -181.9^\circ$  ( $\text{H}_2\text{O}$ ) (lit.<sup>27</sup> -201°); HREIMS 127.0633 (127.0633 calcd. for  $\text{C}_6\text{H}_9\text{NO}_2$ ).

SCHEME 3

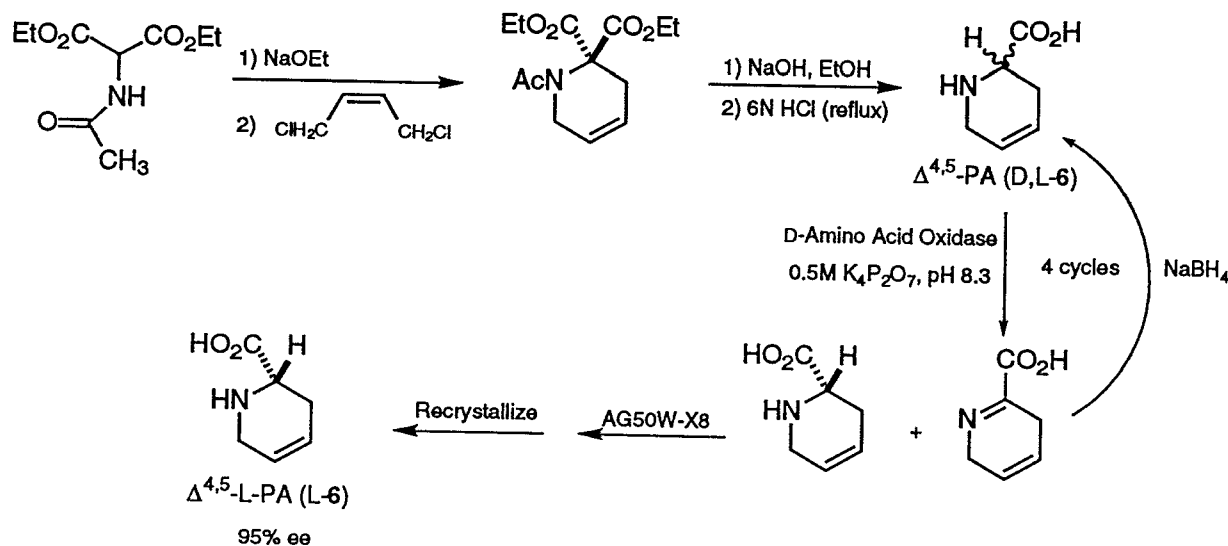

## References

- (19) Burgstahler, A. W.; Aiman, C. E. A Direct Synthesis of D,L-Baikiain. *J. Org. Chem.* **1960**, *25*, 489-492 and 2263.
- (20) Huh, J. W.; Yokoigawa, K.; Esaki, N.; Soda, K. Total Conversion of Racemic Pipecolic Acid into the L-Enantiomer by a Combination of Enantiospecific Oxidation with D-Amino Acid Oxidase and Reduction with Sodium Borohydride. *Biosci. Biotech. Biochem.* **1992**, *56*, 2081-2082.
- (25) Perrin, D.D.; Armarego, W.L.F.; Perrin, D.R. *Purification of Laboratory Chemicals*; 2nd Ed., Pergamon Press: New York, 1980.
- (26) Lam, S.; Azumaya, H.; Karmen, A. High-Performance Liquid Chromatography of Amino Acids in Urine and Cerebrospinal Fluid. *J. Chromatogr.* **1984**, *302*, 21-29.
- (27) King, F.E.; King, T.J.; Warwick, A.J. The Chemistry of Extractives from Hardwoods. Part III. Baikiain, an Amino Acid Present in *Baikiaea plurijuga*. *J. Chem. Soc.* **1950**. 3590-3597.

Figure 4.  $^1\text{H}$  and  $^{13}\text{C}$  NMR spectra of L-6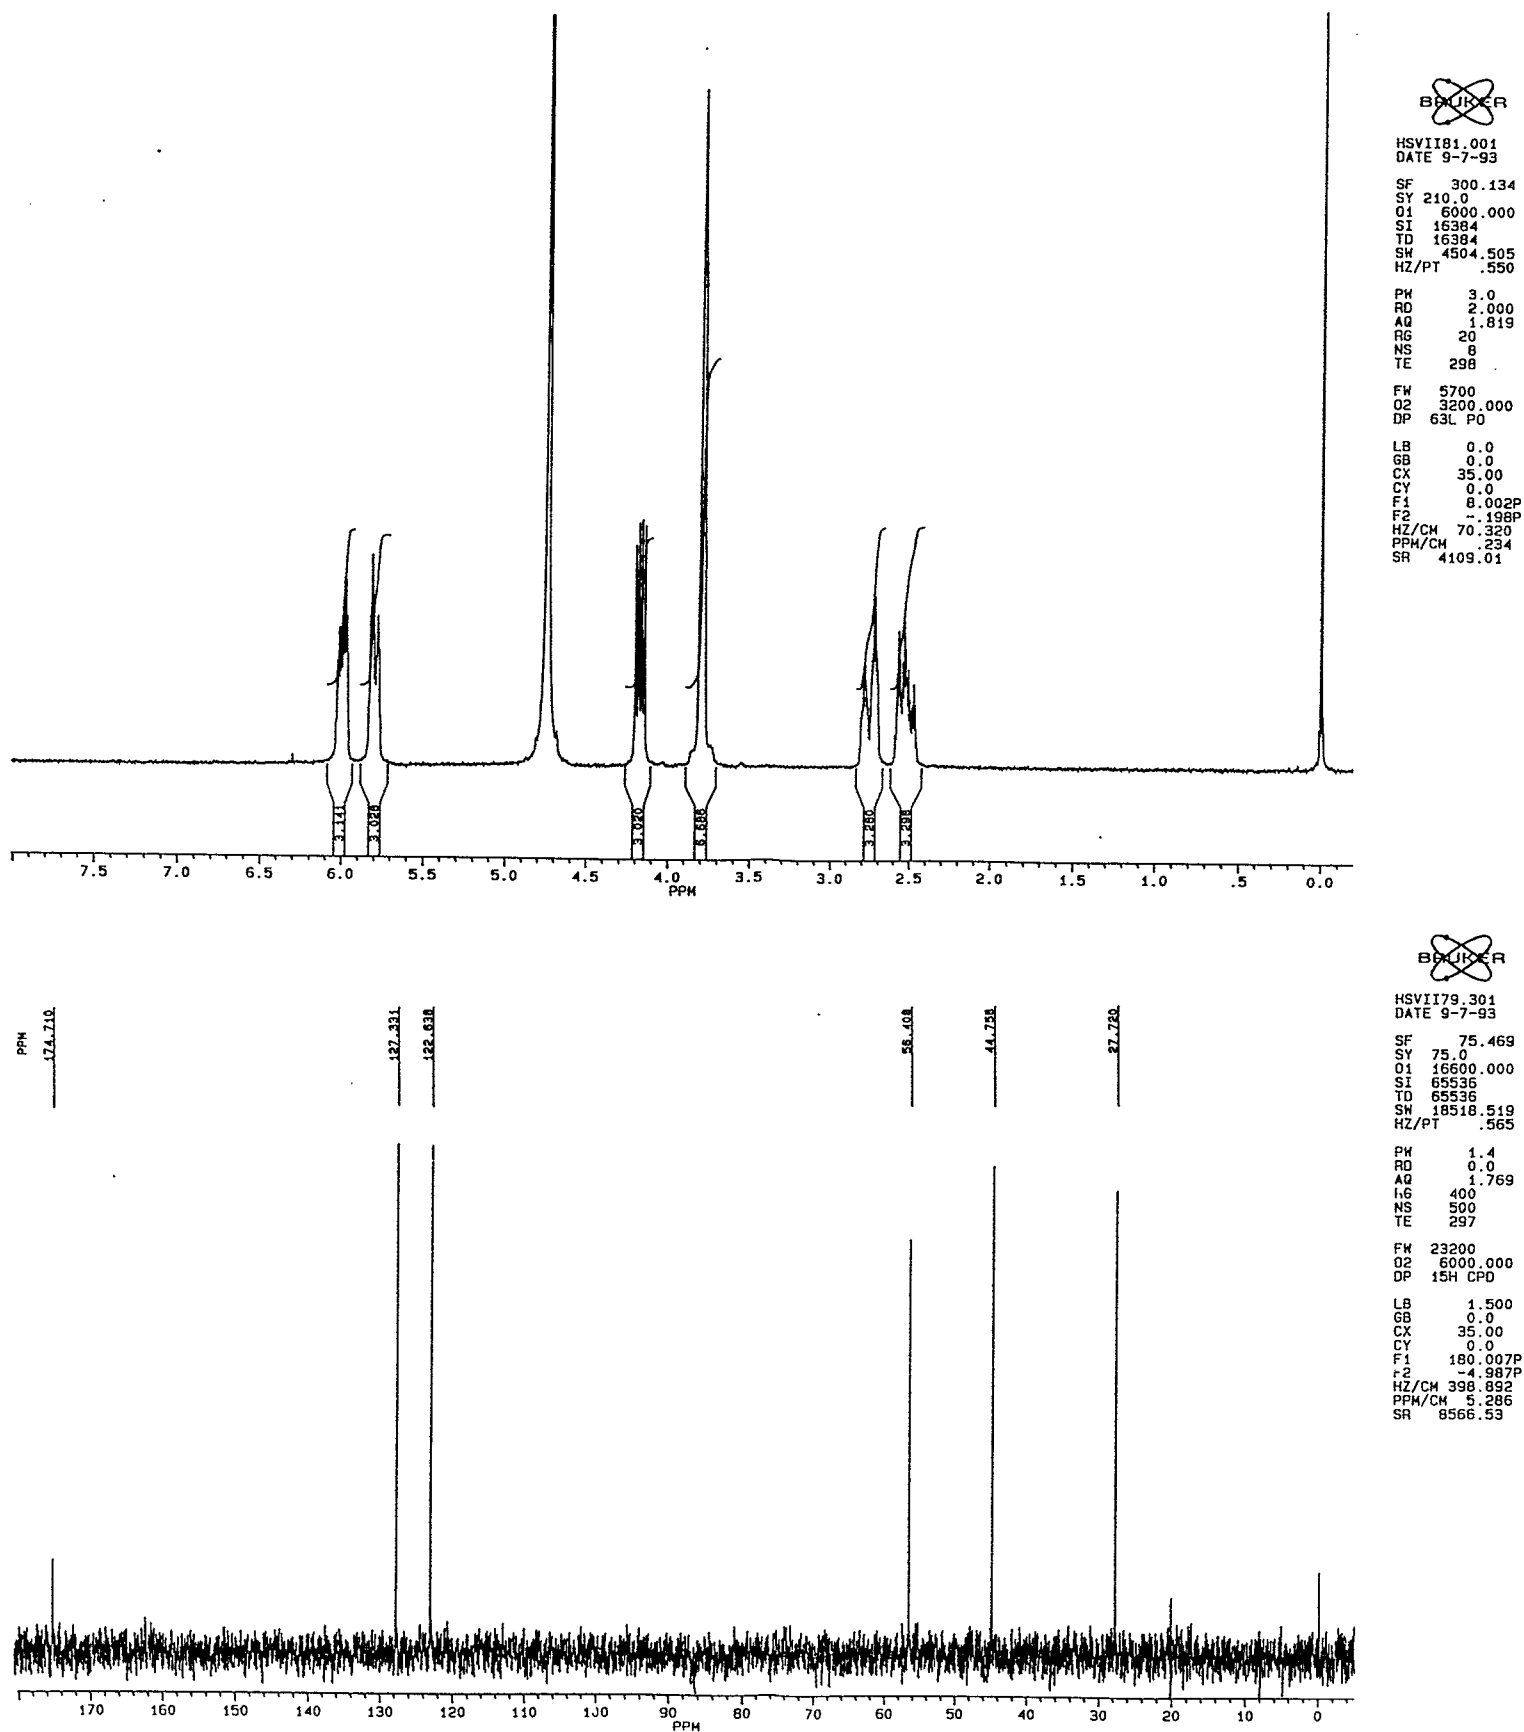

Figure 5. HPLC analyses of D,L-6 and L-6

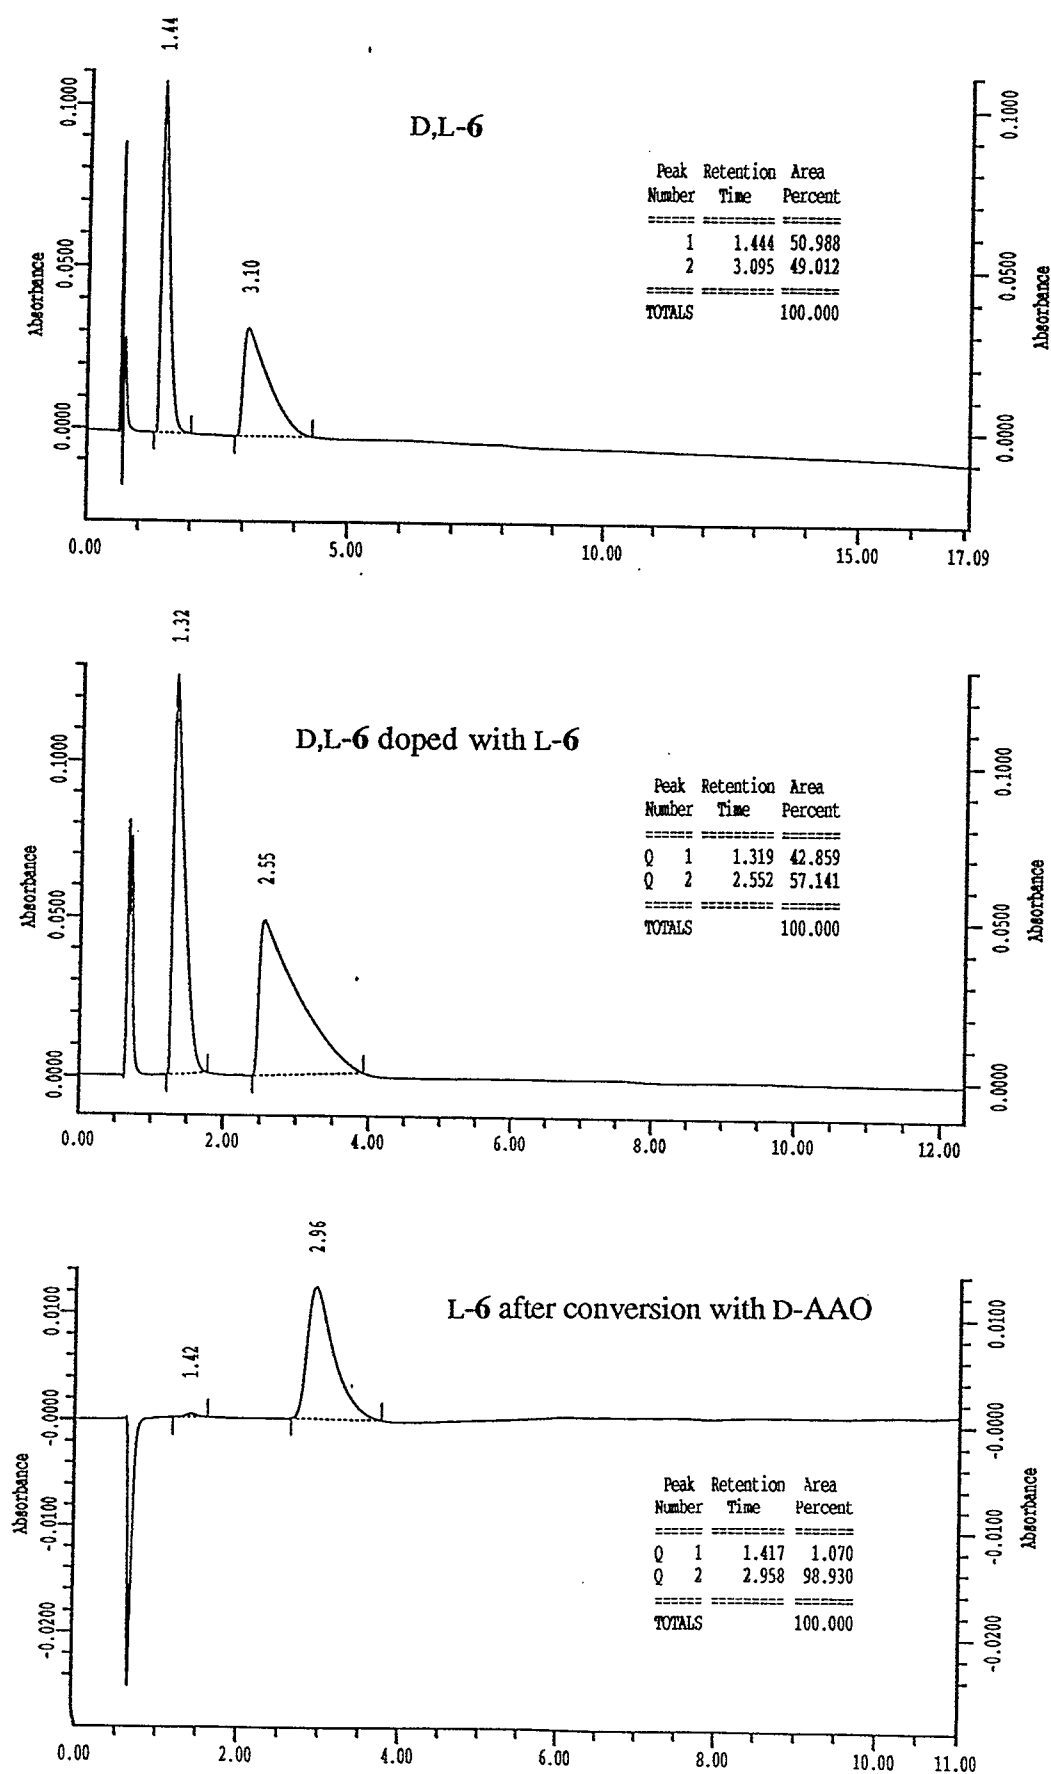

Supplement: Supplementary file 1 [file 5772363]
